# Supplementary material for: Integrin α6β4 Identifies Human Distal Lung Epithelial Progenitor Cells with Potential as a Cell-Based Therapy for Cystic Fibrosis Lung Disease
Source: PubMed Central journal article supplement (PMC3861522; doi:10.1371/journal.pone.0083624), 2013-12-12
Supplement: pone.0083624.s001.pdf [file pone.0083624.s001.pdf]

## Supporting Information

### **Integrin $\alpha 6\beta 4$ identifies human distal lung epithelial progenitor cells with potential as a cell-based therapy for cystic fibrosis lung disease**

Xiaopeng Li, Nathan Rossen, Patrick L. Sinn, Andrew L. Hornick, Benjamin Steines, Philip H. Karp, Sarah E. Ernst, Ryan J. Adam, Thomas O. Moninger, Dana Levasseur, Joseph Zabner

**Supporting Figure S1: Staining of sorted  $\alpha 6^+$ /E-cad $^+$  cells with  $\beta 4$ .**

**Supporting Figure S2: Control for SPC antibody.**

**Supporting Figure S3: Additional images of *de novo* induction of K-5 expression in human  $\alpha 6^+$  cells.**

**Supporting Video Image S1: Time-lapse videography of clonal expansion of  $\alpha 6^+$  epithelial cells isolated from the distal human lung.** *\*This video can be viewed using QuickTime Player.*

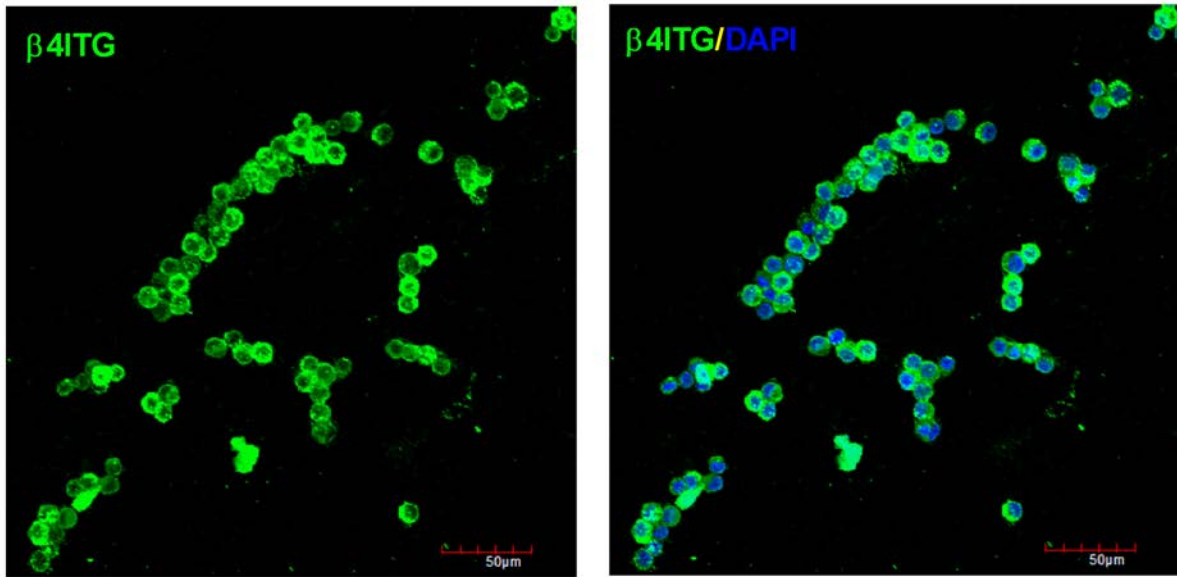

**Supporting Figure S1: Staining of sorted  $\alpha6^+$ /E-cad $^+$  cells with  $\beta4$ .** Epithelial cells were isolated from a normal human lung, and surface markers  $\alpha6$  and E-cadherin were labelled with Alexa Fluor-568 and Alexa Fluor-647, respectively, and analyzed by FACS. Populations of  $\alpha6^+$ /E-cad $^+$  cells were cytopinned on slides and immediately immunostained with an antibody against  $\beta4$  (green). Nuclei were stained with DAPI (blue). Scale bar= 50  $\mu$ m.

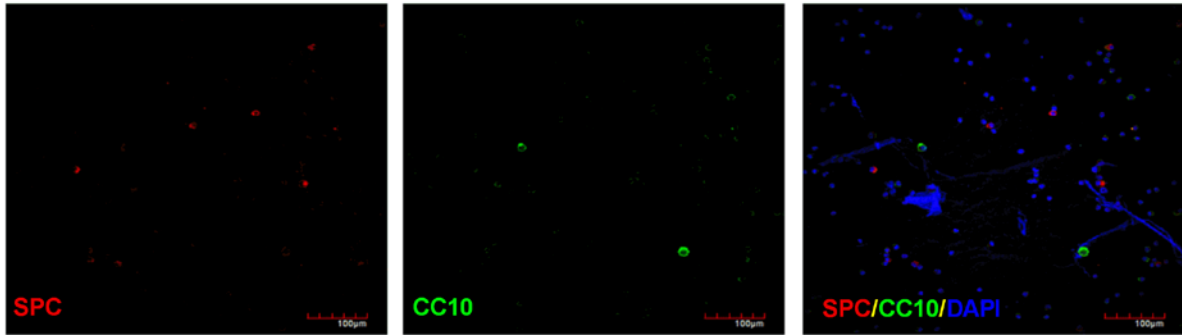

**Supporting Figure S2: Control for SPC antibody.** Populations of  $\alpha 6^{+}/E\text{-cad}^{+}$  cells were cytopinned on slides and immediately immunostained with antibodies against SPC (red) and CC10 (green). Nuclei were stained with DAPI (blue). Scale bar= 100  $\mu\text{m}$ .

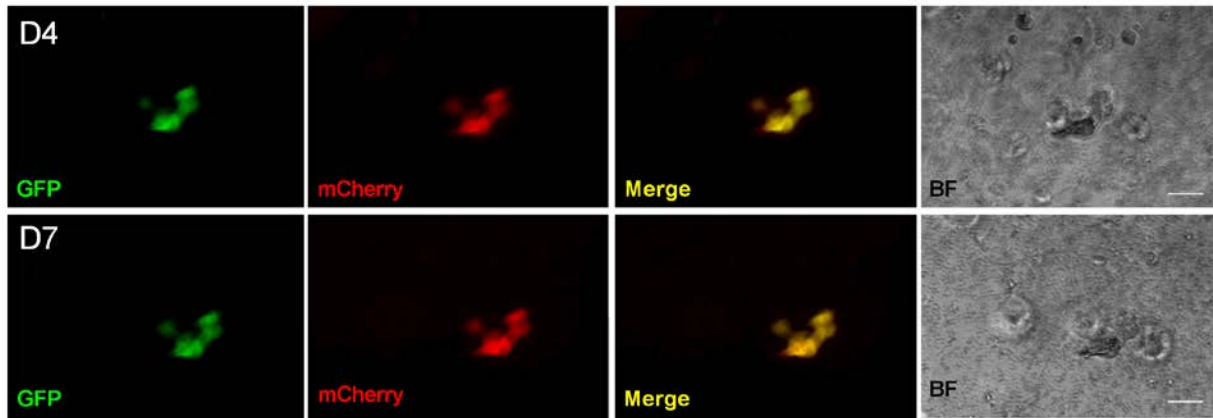

**Supporting Figure S3: Additional images of *de novo* induction of K-5 expression in human  $\alpha 6^+$  cells.** Fluorescence images of a dual GFP (green) and mCherry (red)-positive colony at 4 and 7 days of culture of  $\alpha 6^+$  cells infected with the dual-color lentiviral reporter and co-cultured with HUVECs. Also shown are phase contrast images of colonies. Scale bar=100  $\mu$ m. Note that the cluster of cells does not increase in size between days 4 and 7, which suggests that freshly isolated  $\alpha 6^+$  cells that were originally K-5<sup>+</sup> do not undergo clonal expansion in the tested culture conditions. This is in contrast to colonies that were originally GFP-positive/mCherry-negative that later became mCherry-positive (see Figure 6B).
